# Supplementary material for: Hydrothermal synthesis and formation mechanism of photocatalytically active SrTiO3 nanocrystals using anatase TiO2 with different facets as a precursor
Source: Royal Society of Chemistry journal article supplement (doi:10.1039/c4ce02301c), 2015-01-01
Supplement: c4ce02301c1.pdf [file c4ce02301c1.pdf]

## Supporting Information

### **Hydrothermal synthesis and formation mechanism of photocatalytically active SrTiO<sub>3</sub> nanocrystals using anatase TiO<sub>2</sub> with different facets as a precursor**

Jingmiao Peng<sup>[a],[b]</sup>, Ying Zhou\*<sup>[a],[b]</sup>, Hao Wang<sup>[c]</sup>, Haoran Zhou<sup>[b]</sup>, and Shiyi Cai,<sup>[b]</sup>

<sup>[a]</sup> State Key Laboratory of Oil and Gas Reservoir and Exploitation, Southwest Petroleum University, Chengdu 610500, China

<sup>[b]</sup> School of Materials Science and Engineering, Southwest Petroleum University, Chengdu 610500, China

<sup>[c]</sup> School of Chemistry and Chemical Engineering, Southwest Petroleum University, Chengdu 610500, China

\*To whom correspondence should be addressed

Tel: + 86 28 83037411; Fax: +86 28 83037406

Email: [yzhou@swpu.edu.cn](mailto:yzhou@swpu.edu.cn) (Y. Zhou)

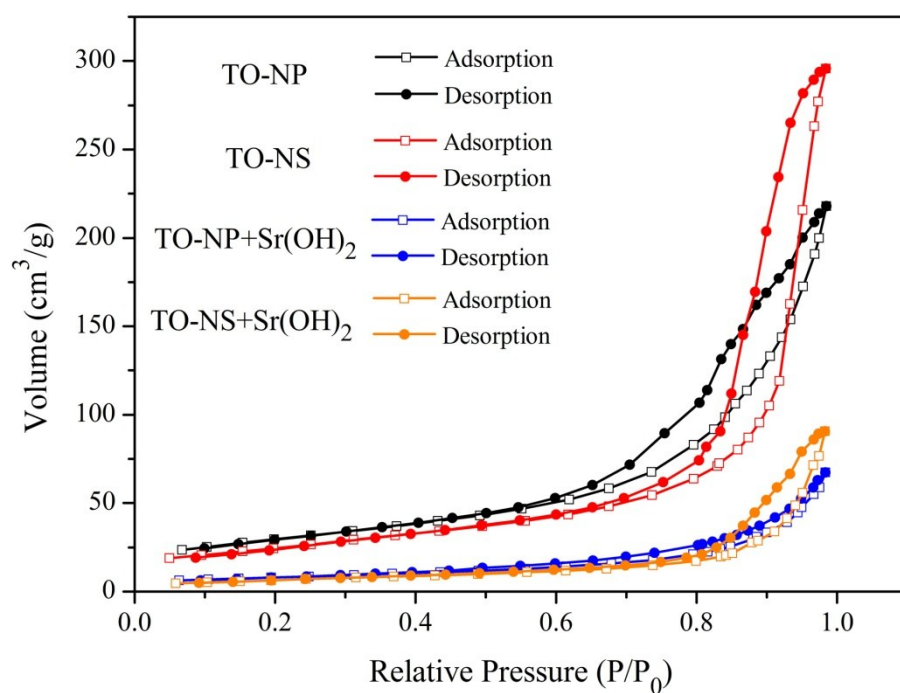

**Figure S1.** Nitrogen adsorption-desorption curves of  $\text{TiO}_2$  precursors and the corresponding  $\text{SrTiO}_3$  products

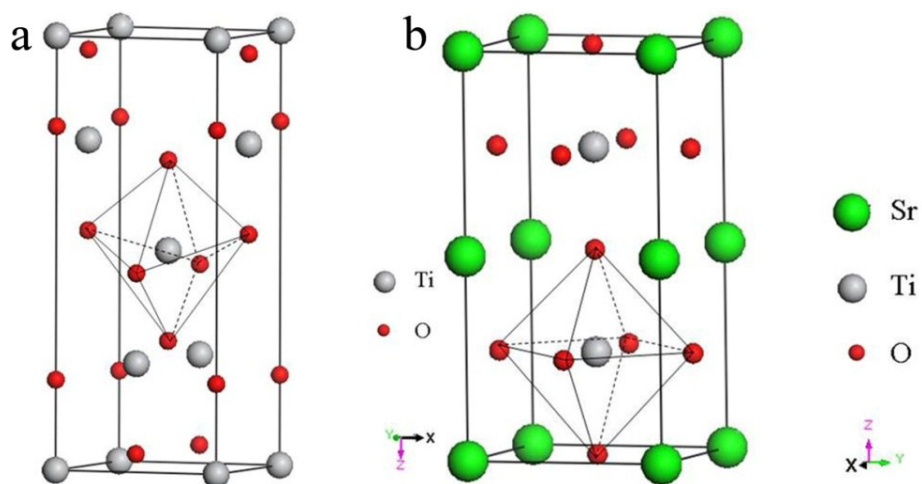

**Figure S2.** Schematic crystal structures of (a) anatase  $\text{TiO}_2$  and (b)  $\text{SrTiO}_3$

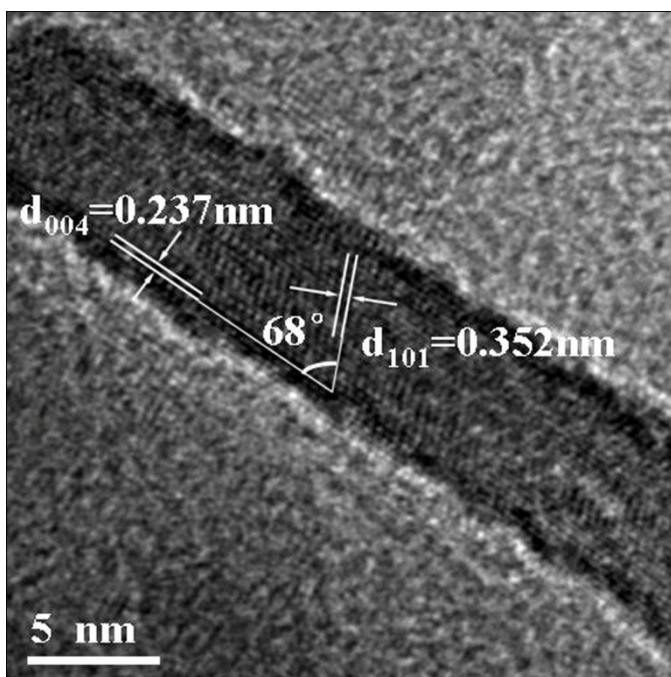

**Figure S3.** Cross section HRTEM image of the TO-NS precursor.

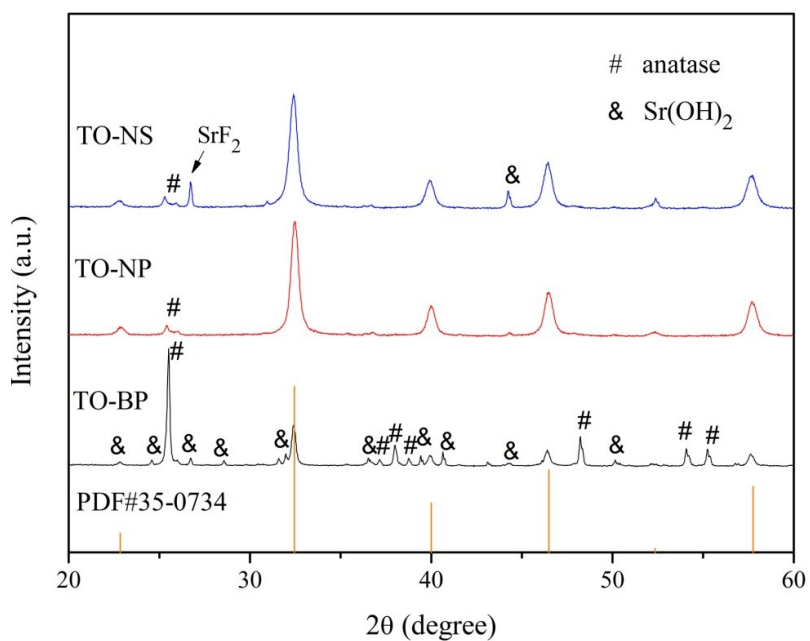

**Figure S4.** The XRD patterns of the products after 10 min of quenching experiments at  $140^\circ \text{C}$  prepared from different anatase  $\text{TiO}_2$  precursors

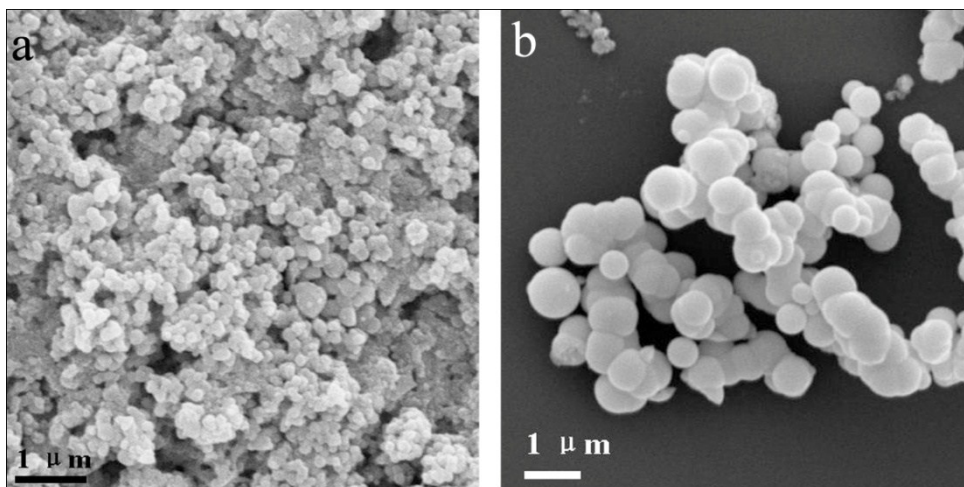

**Figure S5.** (a) SEM image of  $\text{TiO}_2$  particles with bigger size; (b) SEM image of the corresponding products.

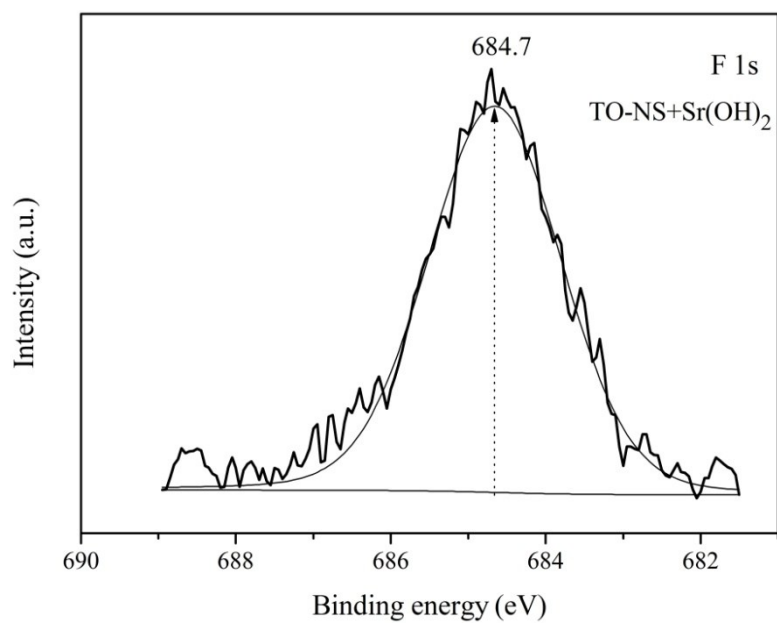

**Figure S6.** F 1s XPS spectra of  $\text{SrTiO}_3$  prepared from TO-NS
